# Supplementary material for: Strongly visible light-absorbing metal–organic frameworks functionalized by cyclometalated ruthenium(ii) complexes
Source: Royal Society of Chemistry journal article supplement (doi:10.1039/c9ra06984d), 2020-01-01
Supplement: c9ra06984d1.pdf [file c9ra06984d1.pdf]

**Supporting information for**  
**Strongly Visible Light-Absorbing Metal-Organic Frameworks**  
**Functionalized by Cyclometalated Ruthenium(II) Complexes**

*Eirik Mydske Thoresen, Sigurd Øien-Ødegaard, Gurpreet Kaur, Mats Tilset, Karl Petter Lillerud, and Mohamed Amedjkouh\**

*\*E-mail: mamou@kjemi.uio.no.*

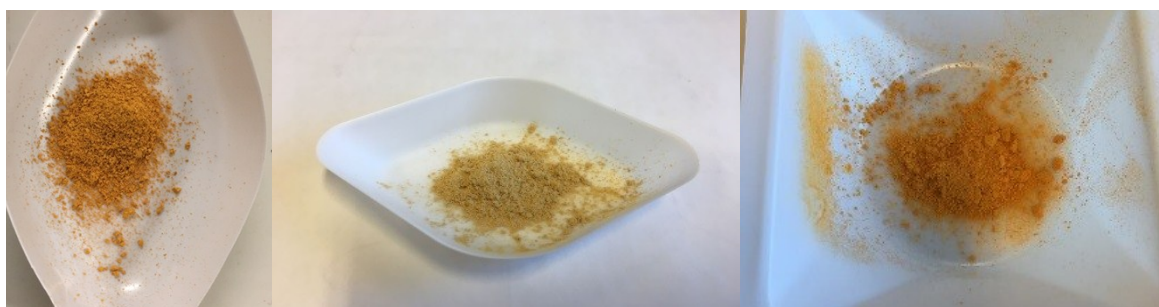

**Figure S1.** Pictures of the powders of (from left to right) 1-Pre, 1-Func, 1-Ex.

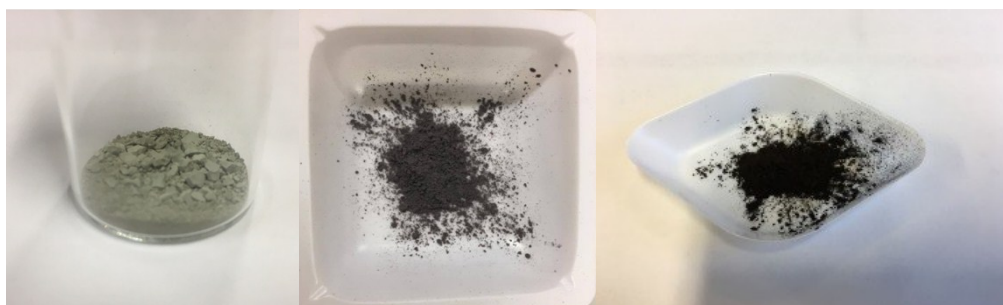

**Figure S2.** Pictures of the powders of (from left to right) 2-Pre, 2-Func, 2-Ex.

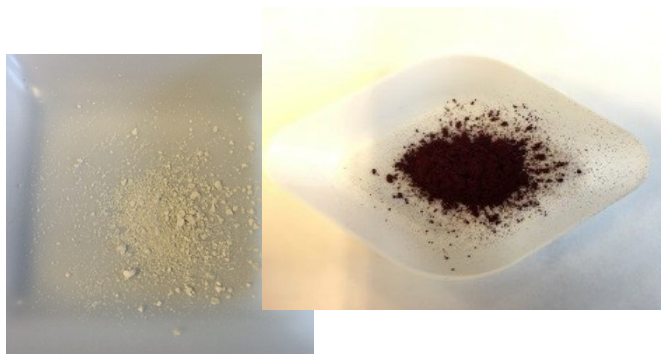

**Figure S3. Pictures of the powders of (from left to right) 3-Pre, 3-Ex.**

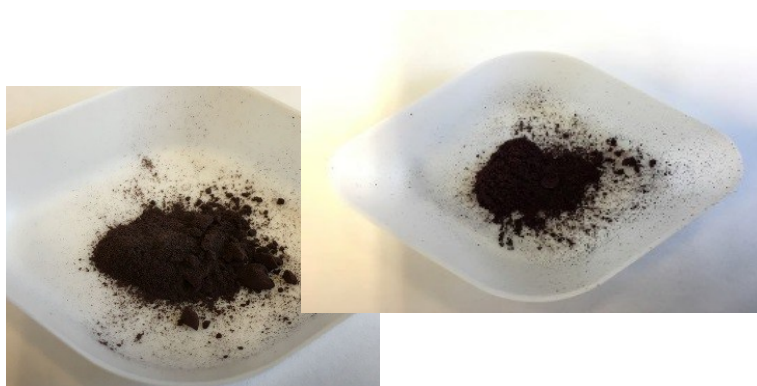

**Figure S4. Pictures of the powders of (from left to right) 4-Pre, 4-Ex.**

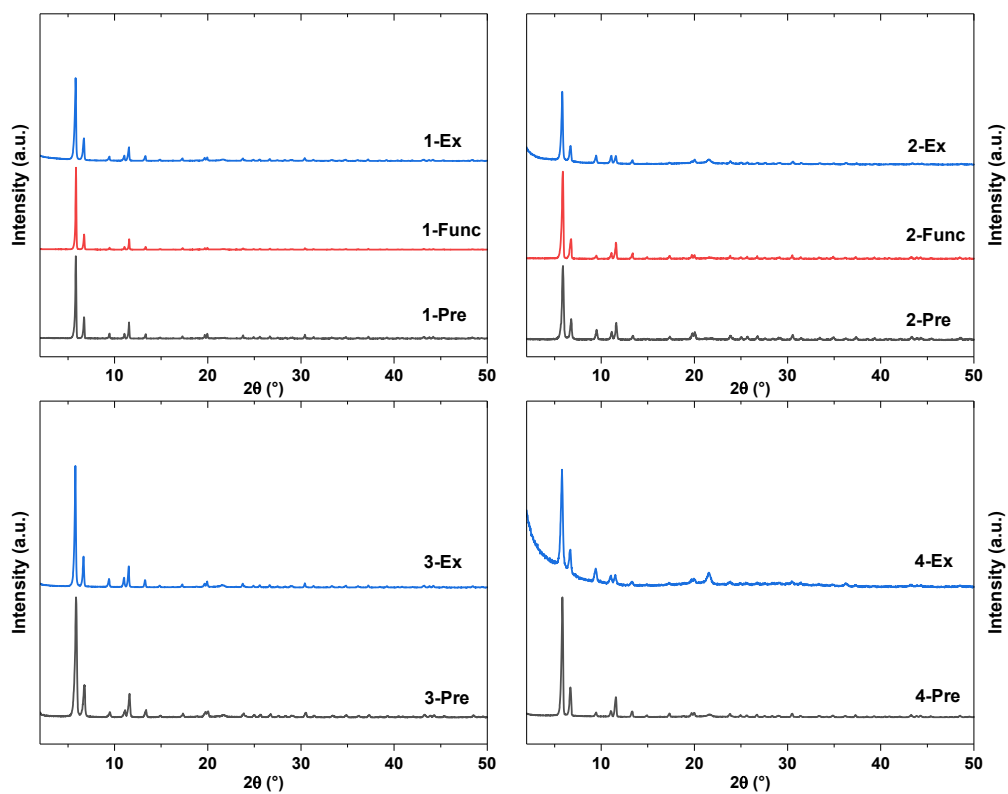

Figure S5. Powder X-ray diffraction patterns for the Ru(II)-functionalized UiO-67 MOFs.

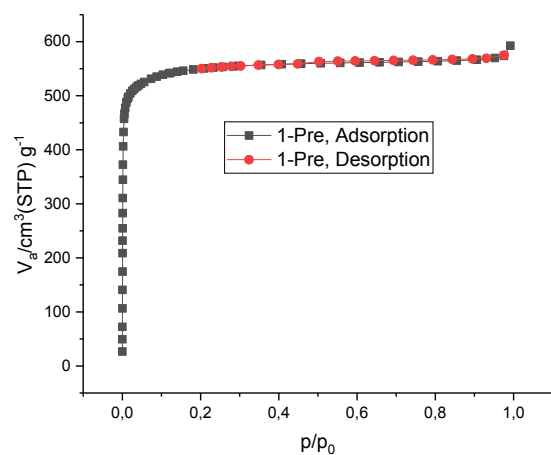

Figure S6. Adsorption/desorption isotherm for 1-Pre.

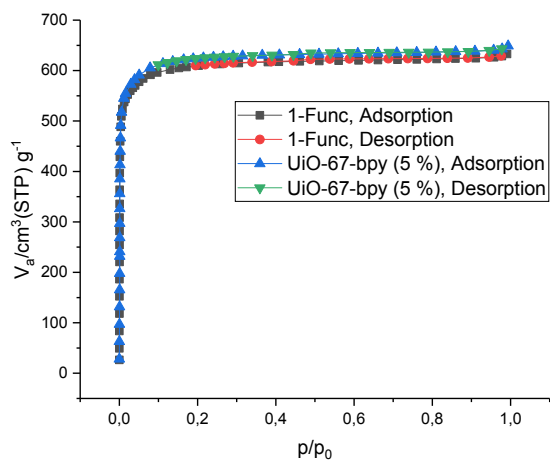

Figure S7. Adsorption/desorption isotherm for 1-Func and UiO-67-bpy (5 %).

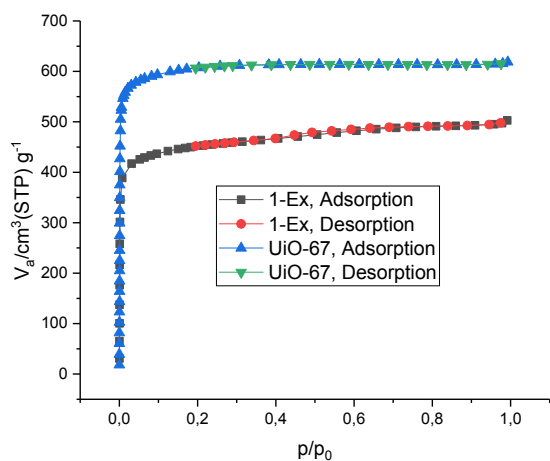

Figure S8. Adsorption/desorption isotherms for 1-Ex and UiO-67.

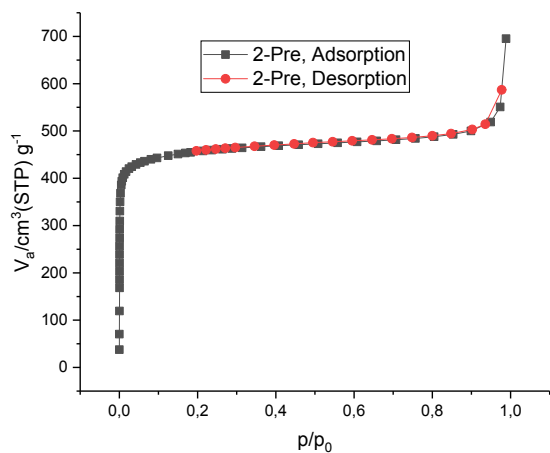

Figure S9. Adsorption/desorption isotherm for 2-Pre.

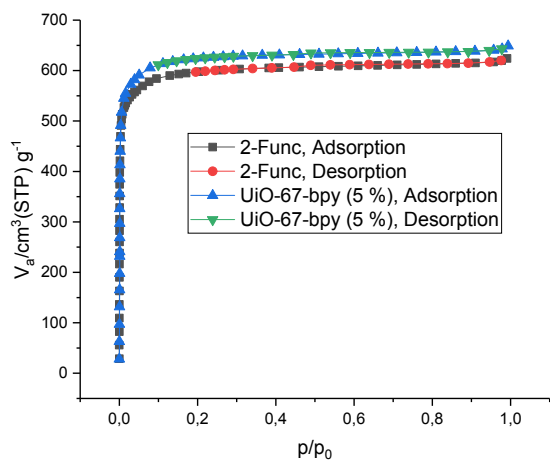

Figure S10. Adsorption/desorption isotherm for 2-Func and UiO-67-bpy (5 %).

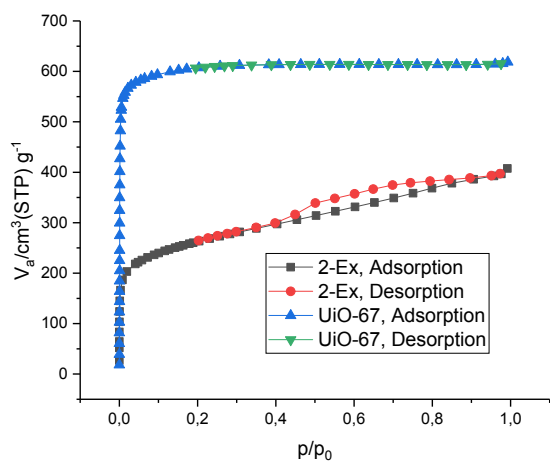

Figure S11. Adsorption/desorption isotherms for 2-Ex and UiO-67.

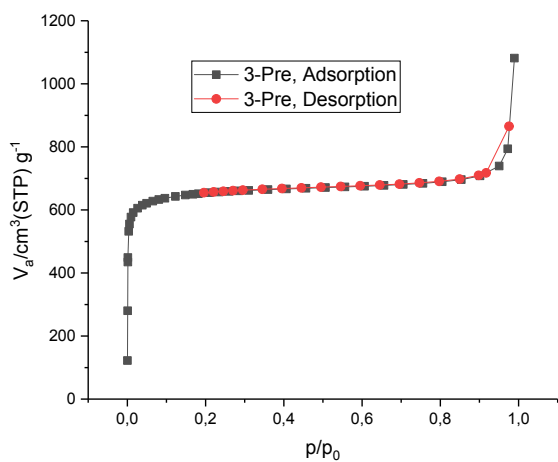

Figure S12. Adsorption/desorption isotherm for 3-Pre.

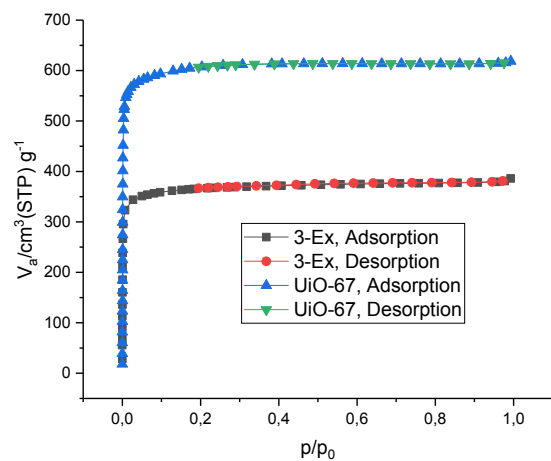

Figure S13. Adsorption/desorption isotherms for 3-Ex and UiO-67.

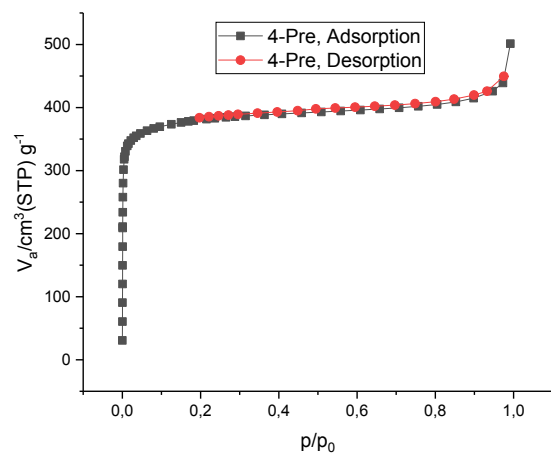

Figure S14. Adsorption/desorption isotherm for 4-Pre.

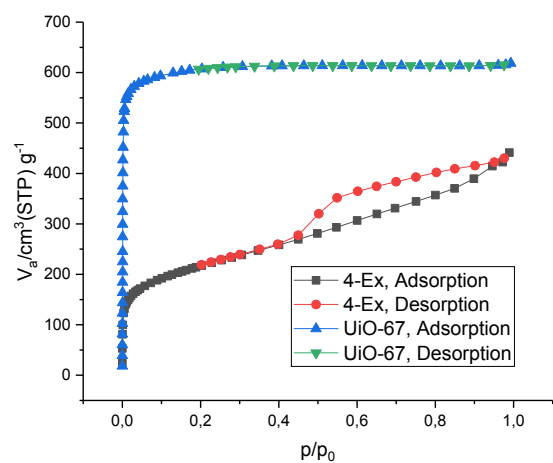

Figure S15. Adsorption/desorption isotherms for 4-Ex and UiO-67.

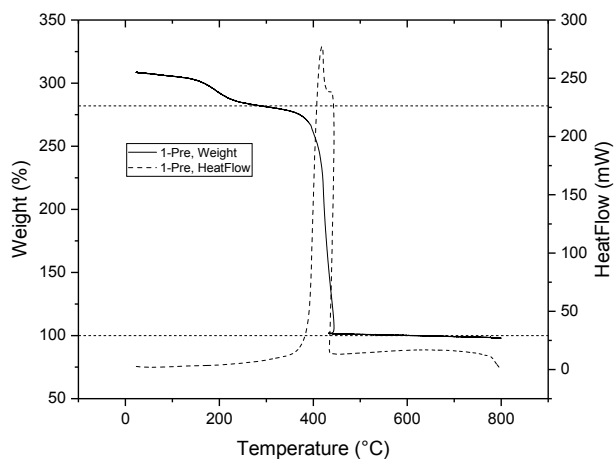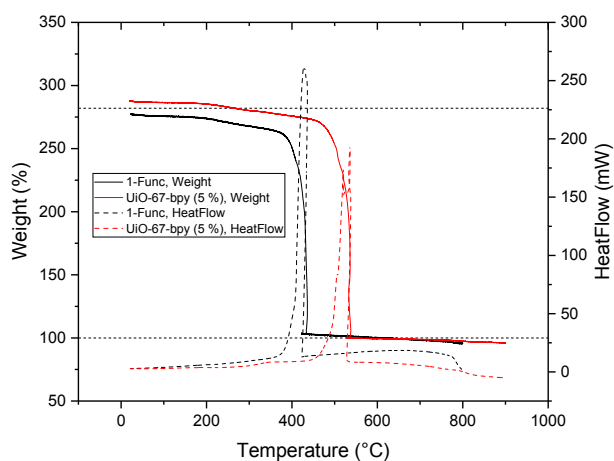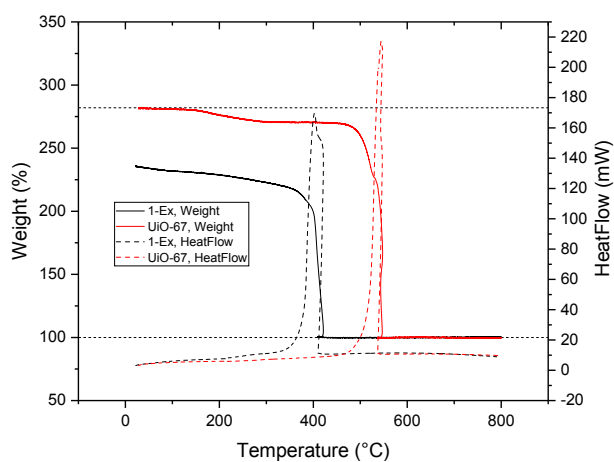

**Figure S16.** TGA-DSC of 1-Pre (top), 1-Func and UiO-67-bpy (5 %) (middle), and 1-Ex and UiO-67 (bottom). Solid curves, left axes – TGA traces (normalized such that end weights = 100 %). Dashed curves, right axes – DSC signals. The theoretical weight of ideal dehydroxylated UiO-67 are emphasized by the upper dashed, horizontal lines (282 %).



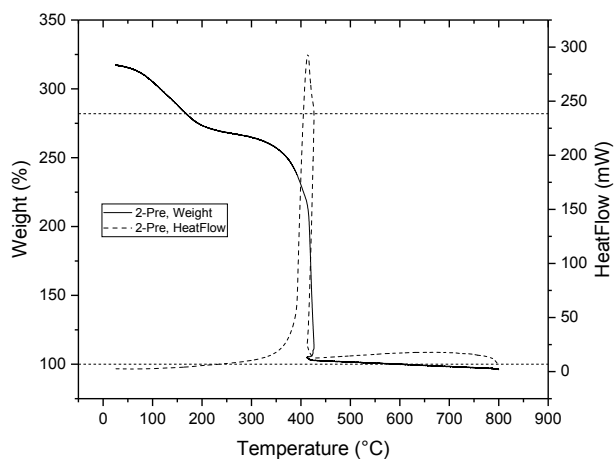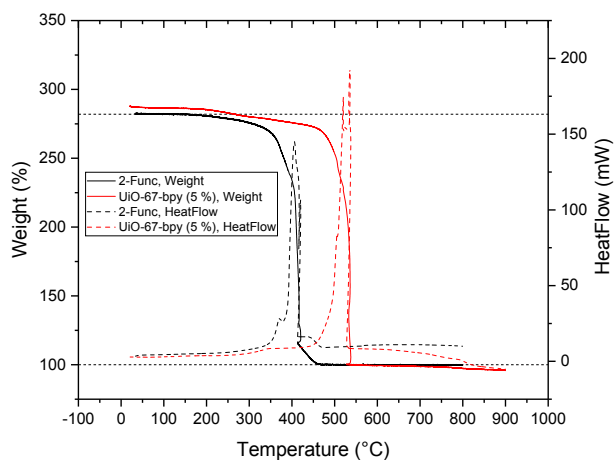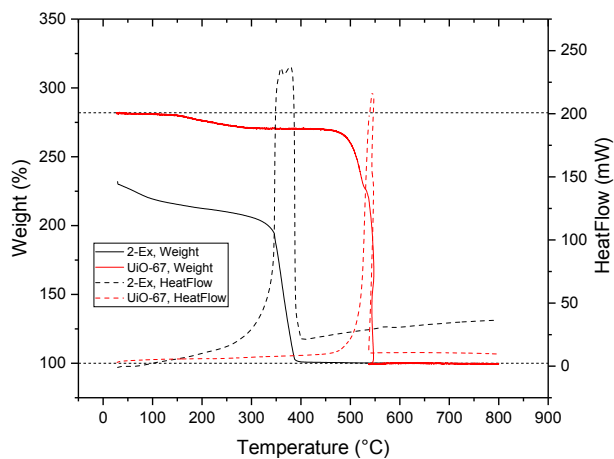

**Figure S17.** TGA-DSC of 2-Pre (top), 2-Func and UiO-67-bpy (5 %) (middle), and 2-Ex and UiO-67 (bottom). Solid curves, left axes – TGA traces (normalized such that end weights = 100 %). Dashed curves, right axes – DSC signals. The theoretical weight of ideal dehydroxylated UiO-67 are emphasized by the upper dashed, horizontal lines (282 %).

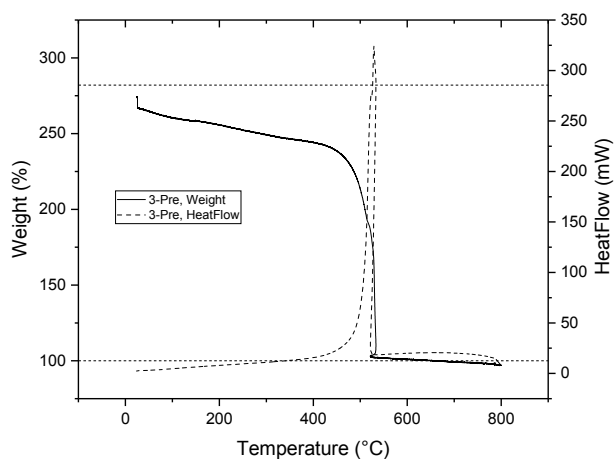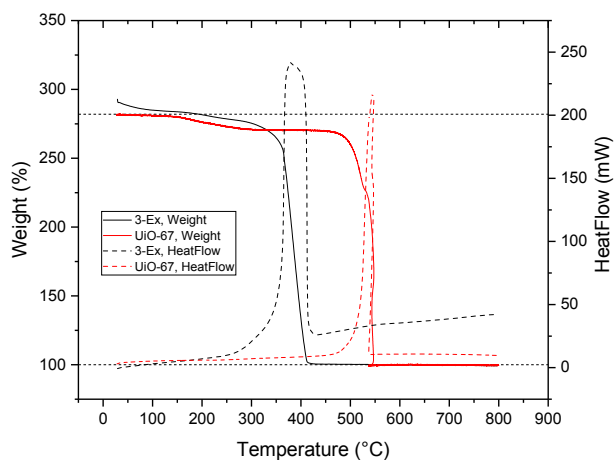

**Figure S18.** TGA-DSC of 3-Pre (top), and 3-Ex and UiO-67 (bottom). Solid curves, left axes – TGA traces (normalized such that end weights = 100 %). Dashed curves, right axes – DSC signals. The theoretical weight of ideal dehydroxylated UiO-67 are emphasized by the upper dashed, horizontal lines (282 %).

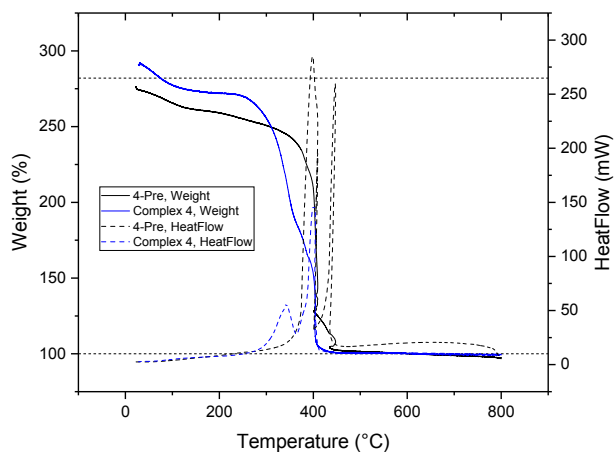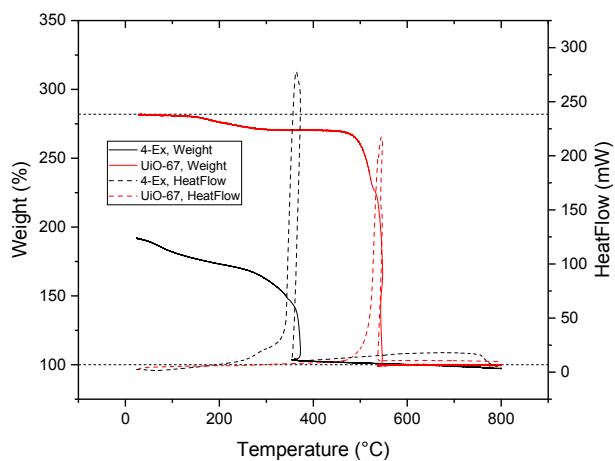

**Figure S19.** TGA-DSC of 4-Pre and complex 4 (top), and 4-Ex and UiO-67 (bottom). Solid curves, left axes – TGA traces (normalized such that end weights = 100 %). Dashed curves, right axes – DSC signals. The theoretical weight of ideal dehydroxylated UiO-67 are emphasized by the upper dashed, horizontal lines (282 %).

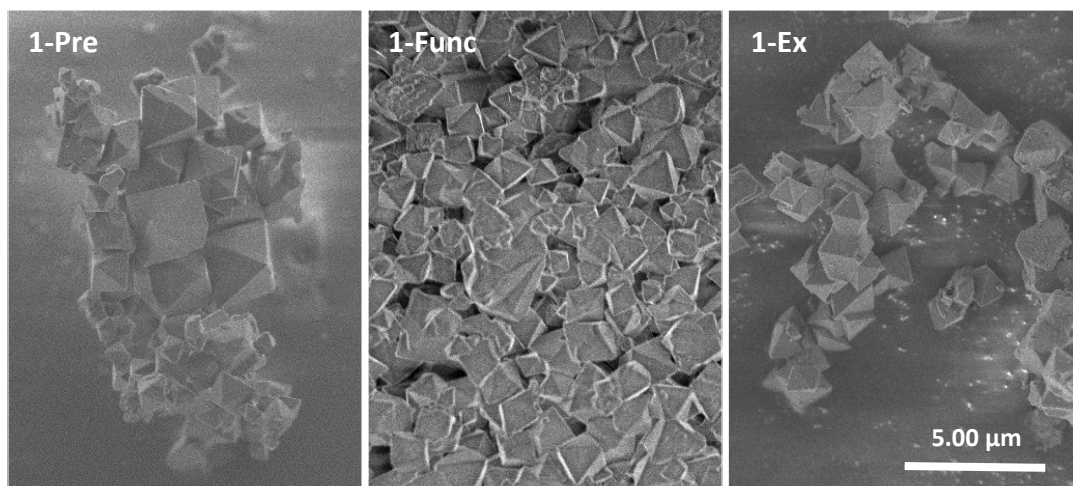

Figure S20. SEM images of the MOFs 1-Pre, 1-Func, and 1-Ex.

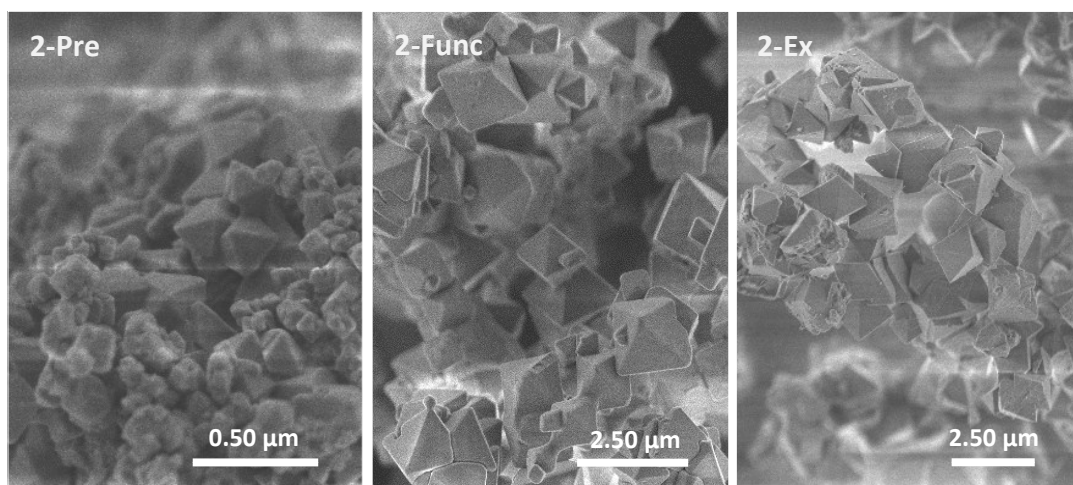

Figure S21. SEM images of the MOFs 2-Pre, 2-Func, and 2-Ex.

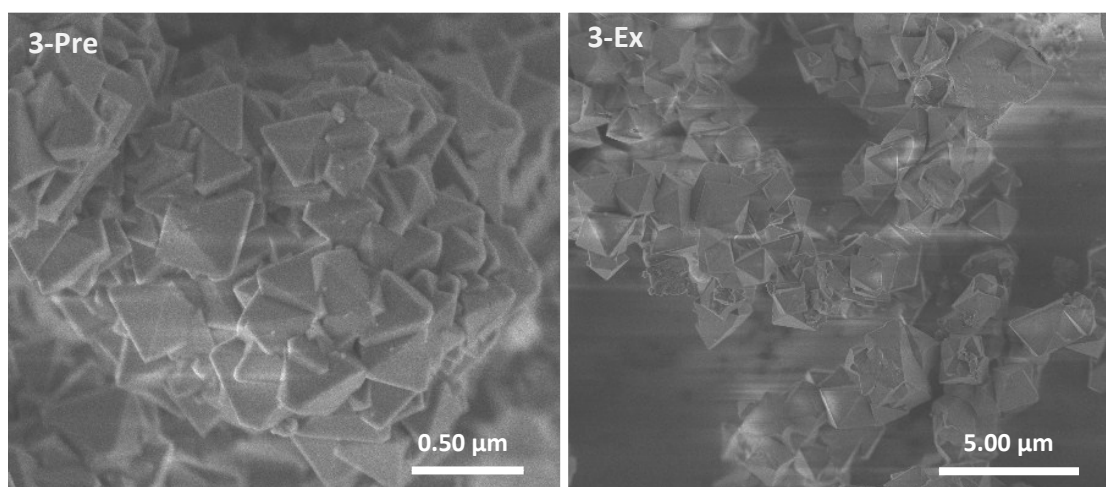

Figure S22. SEM images of the MOFs 3-Pre and 3-Ex.

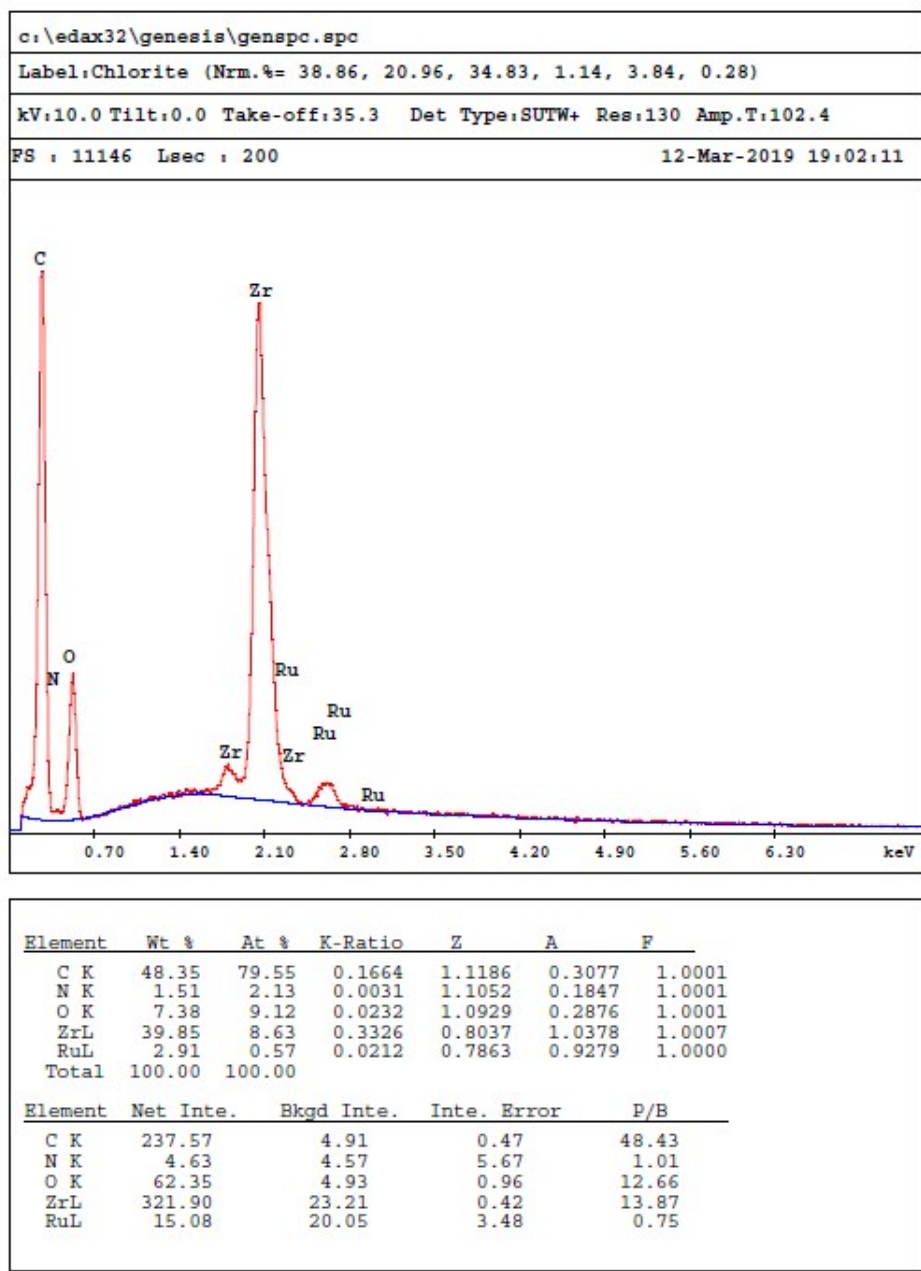

Figure S23. EDS spectrum and elemental analysis of 1-Pre.

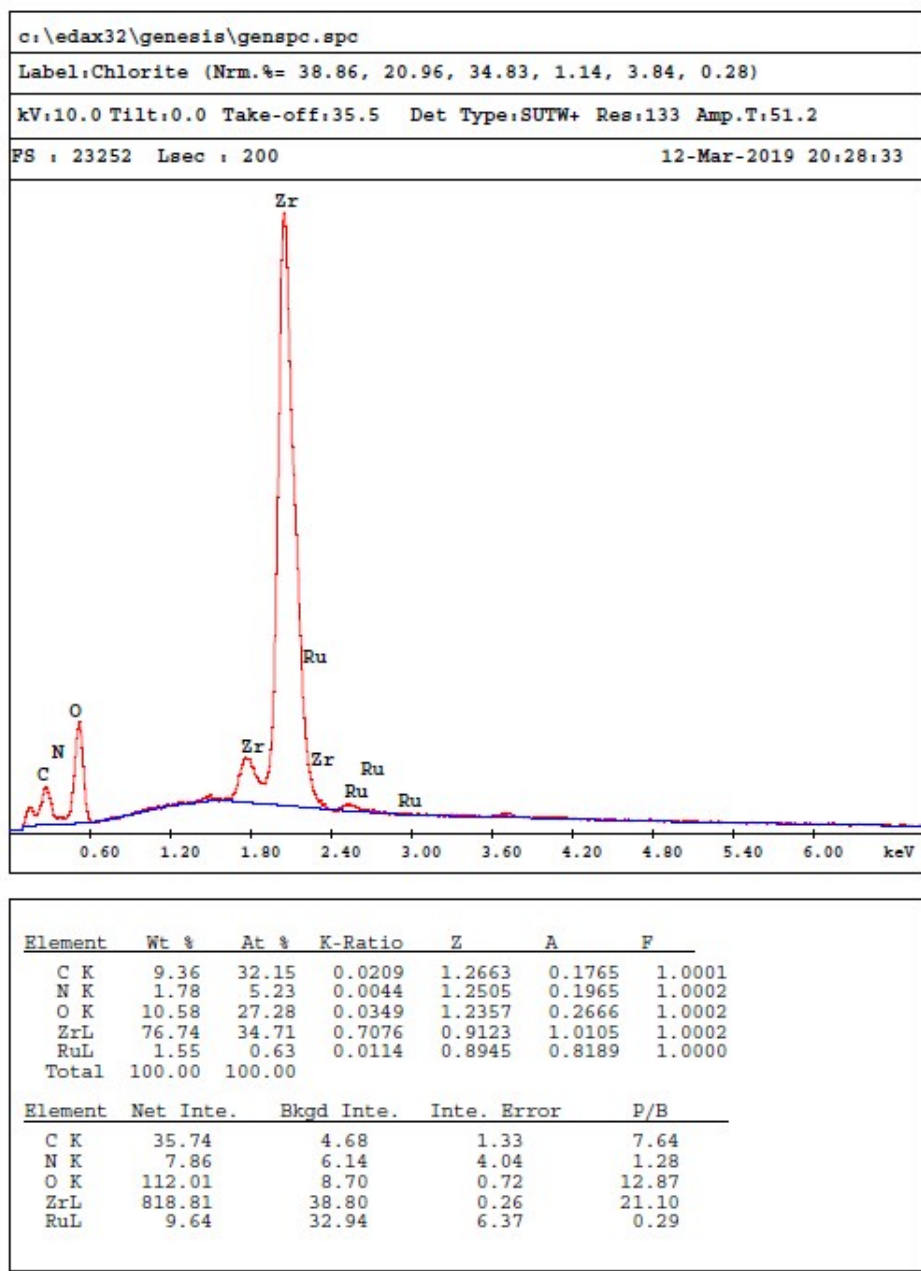

Figure S24. EDS spectrum and elemental analysis of 1-Ex.

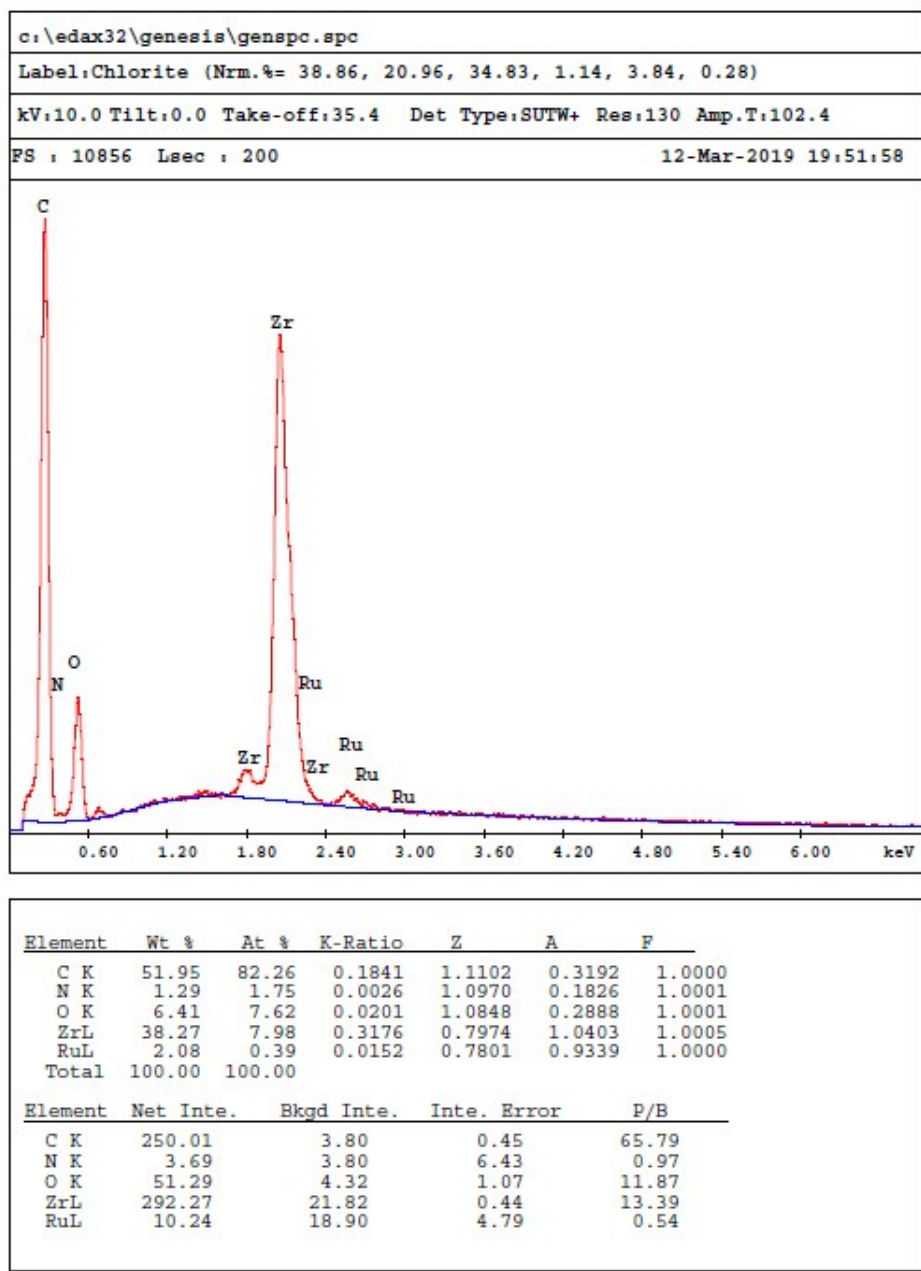

Figure S25. EDS spectrum and elemental analysis of 2-Func.

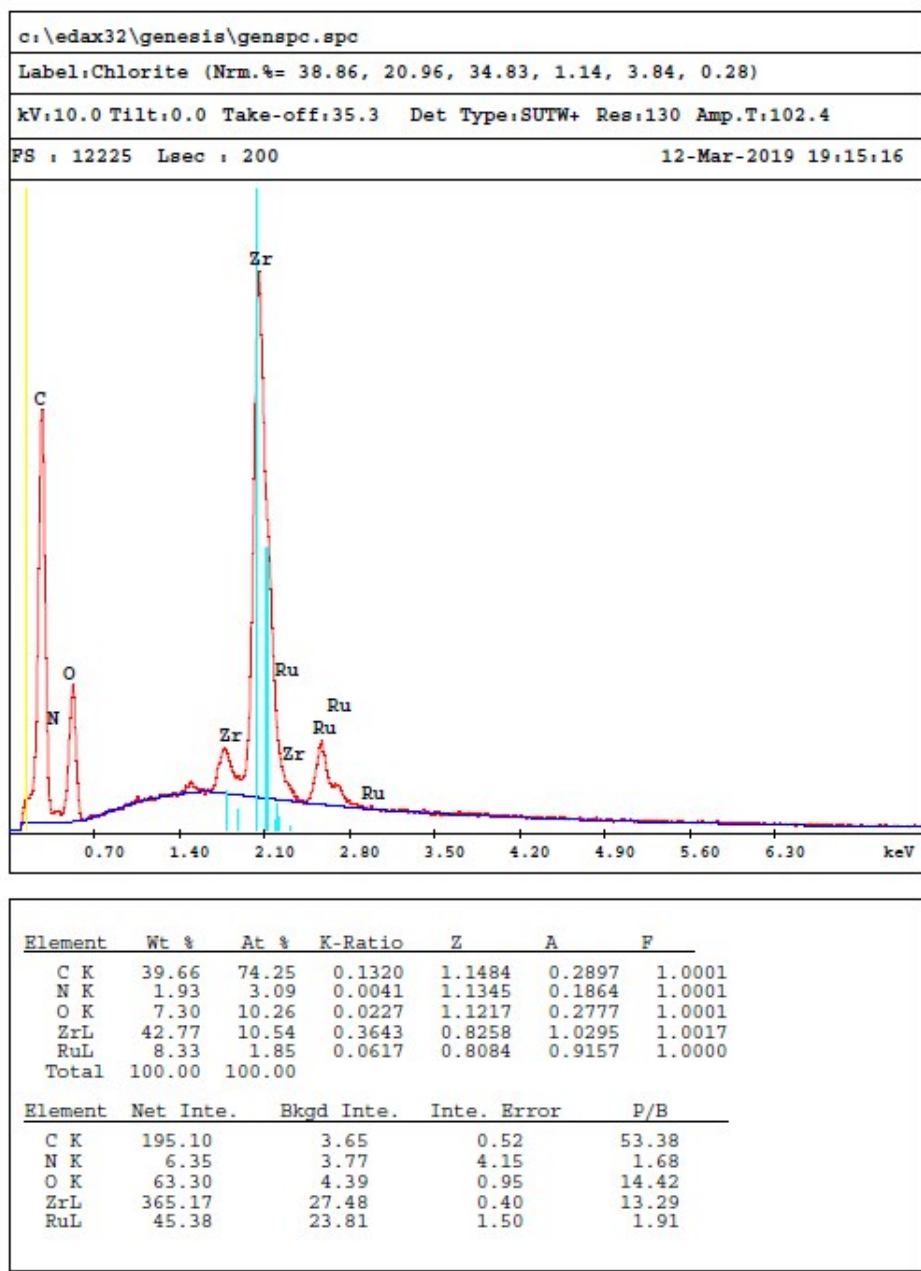

Figure S26. EDS spectrum and elemental analysis of 2-Ex.



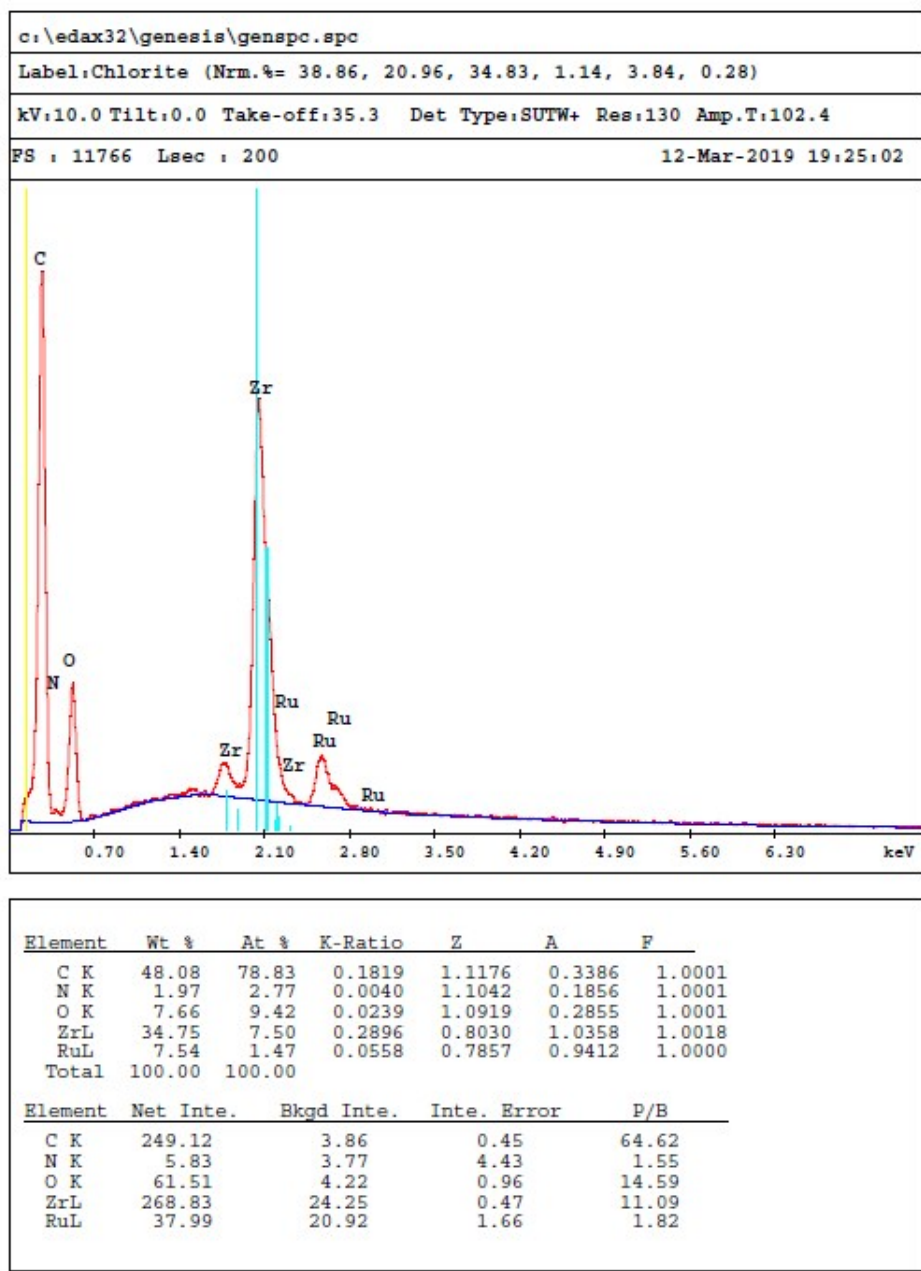

Figure S27. EDS spectrum and elemental analysis of 3-Ex.

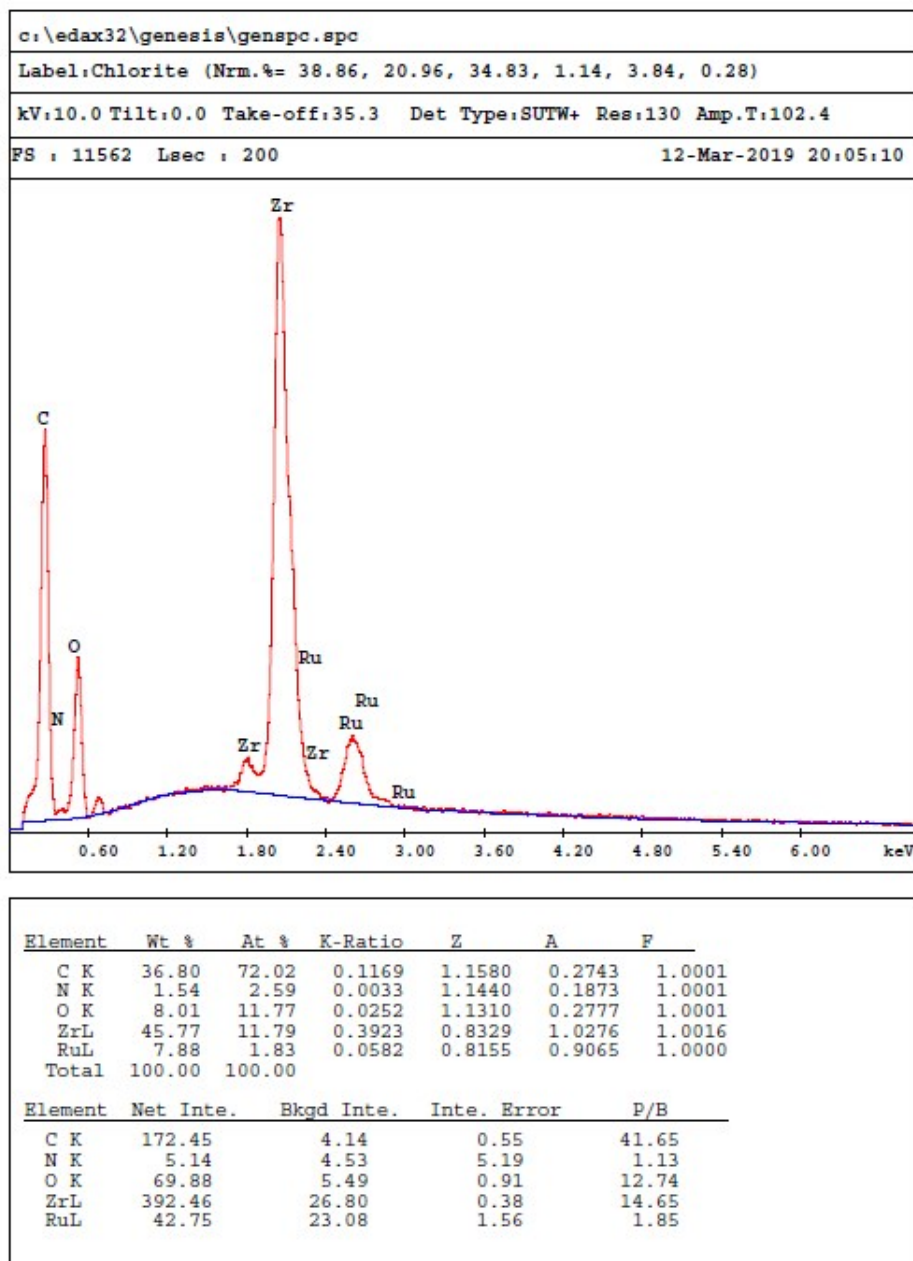

Figure S28. EDS spectrum and elemental analysis of 4-Pre.

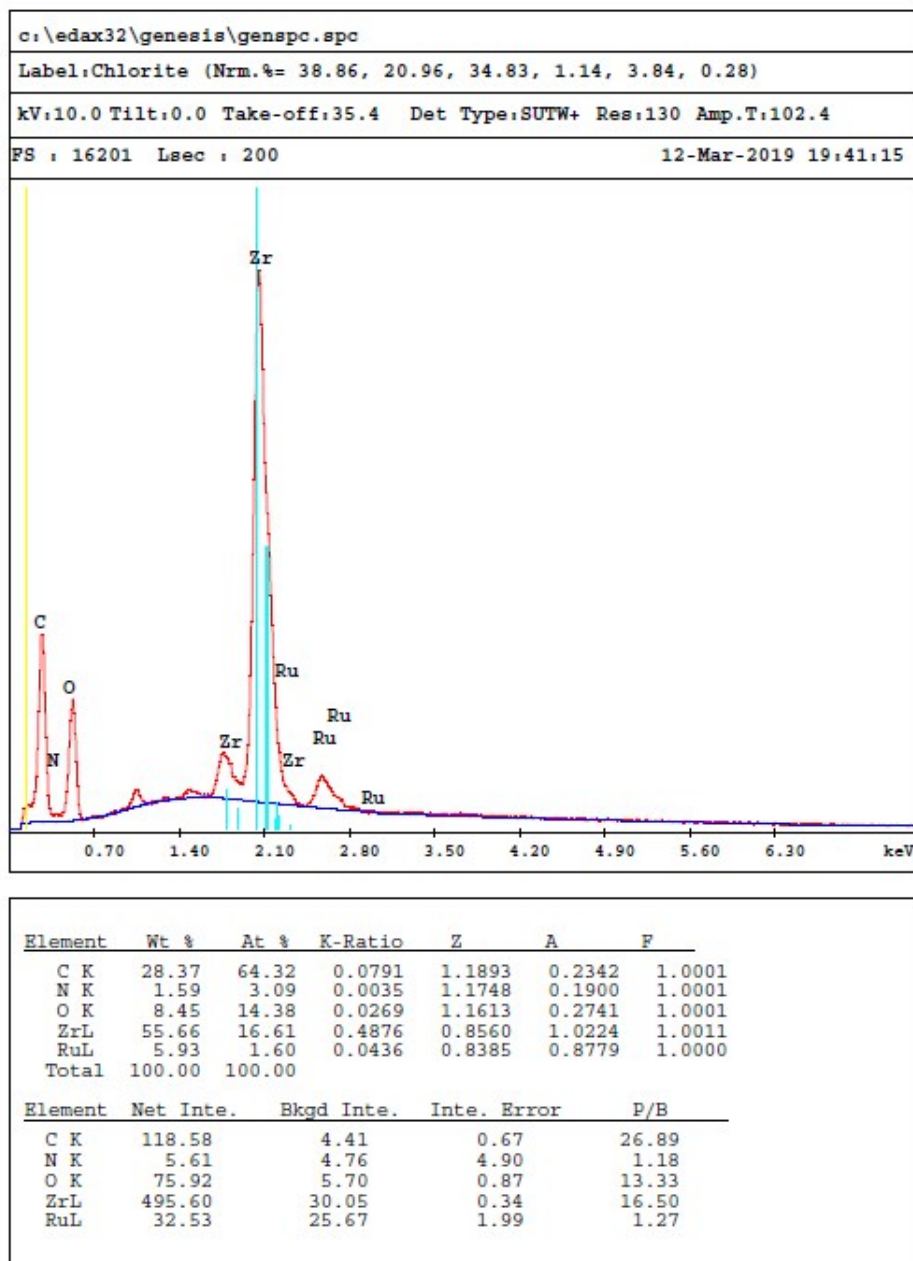

Figure S29. EDS spectrum and elemental analysis of 4-Ex.

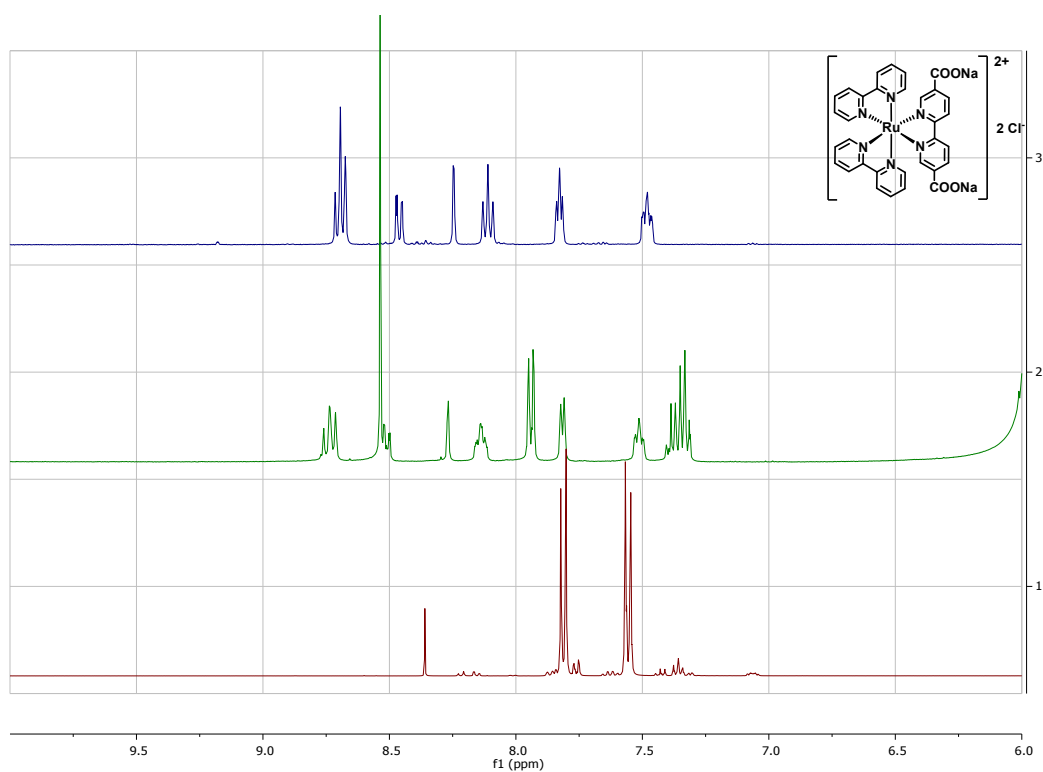

**Figure S30.**  $^1\text{H}$  NMR spectra of 1-Pre digested in 1 M NaOH in  $\text{D}_2\text{O}$  (bottom), redissolved in  $\text{CD}_3\text{OD}$  (middle) and complex 1 in  $\text{CD}_3\text{OD}$  with a drop of 1 M NaOH in  $\text{D}_2\text{O}$  (top).

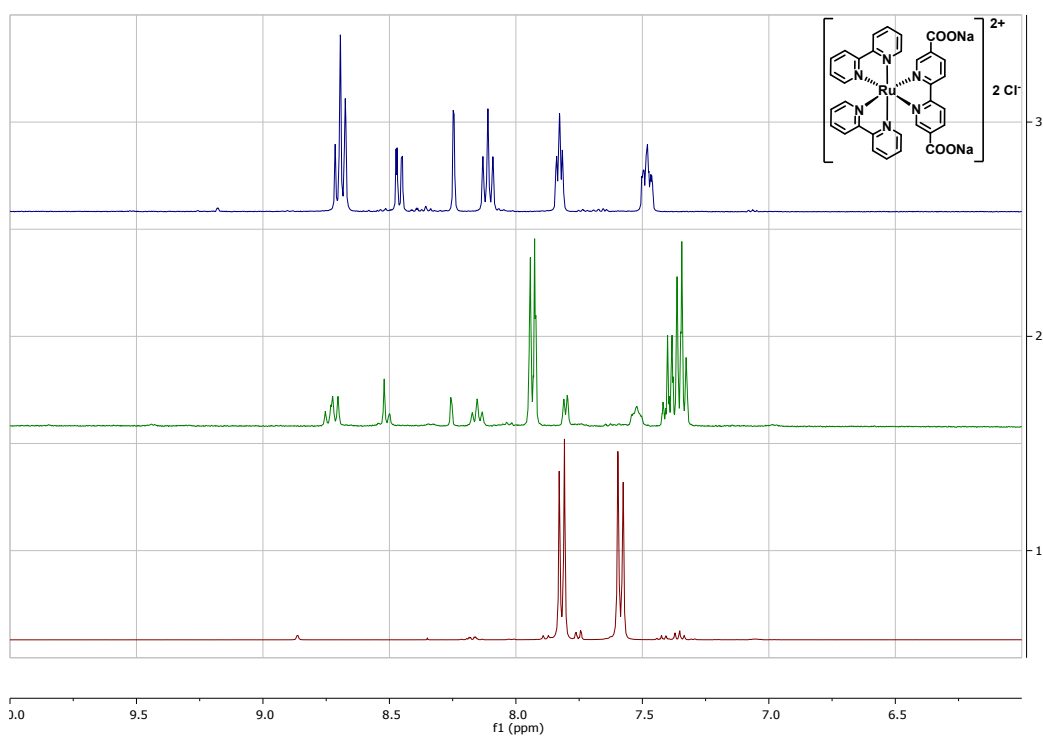

**Figure S31.**  $^1\text{H}$  NMR spectra of 1-Func digested in 1 M NaOH in  $\text{D}_2\text{O}$  (bottom), redissolved in  $\text{CD}_3\text{OD}$  (middle) and complex 1 in  $\text{CD}_3\text{OD}$  with a drop of 1 M NaOH in  $\text{D}_2\text{O}$  (top).

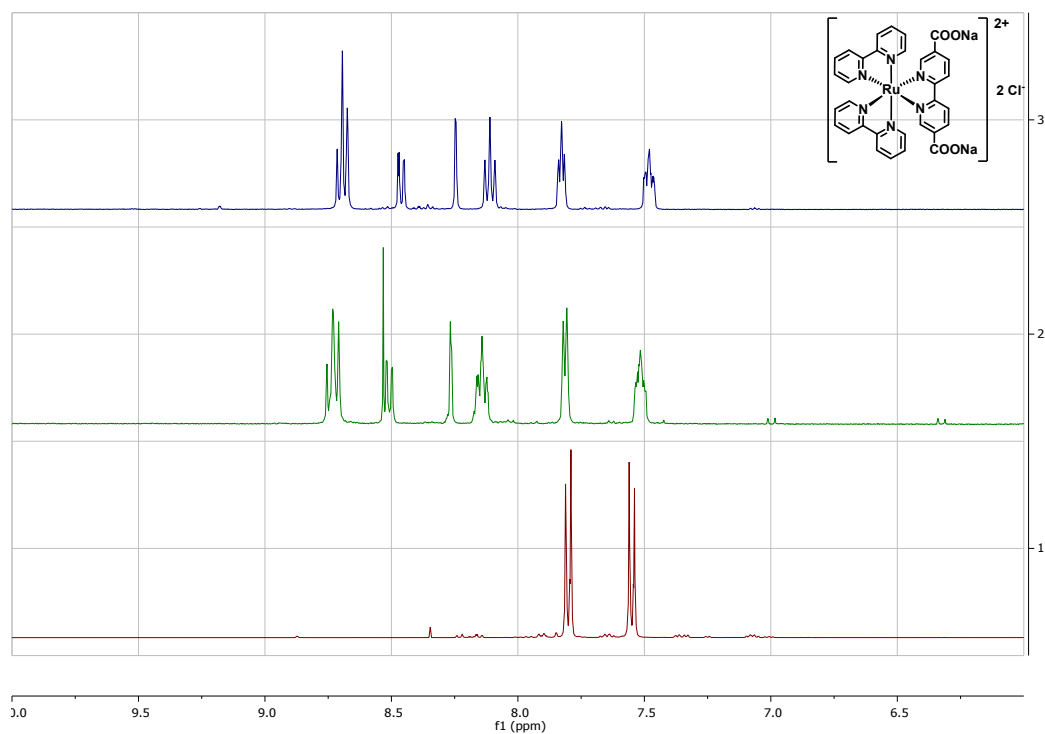

**Figure S32.**  $^1\text{H}$  NMR spectra of 1-Ex digested in 1 M NaOH in  $\text{D}_2\text{O}$  (bottom), redissolved in  $\text{CD}_3\text{OD}$  (middle) and complex 1 in  $\text{CD}_3\text{OD}$  with a drop of 1 M NaOH in  $\text{D}_2\text{O}$  (top).

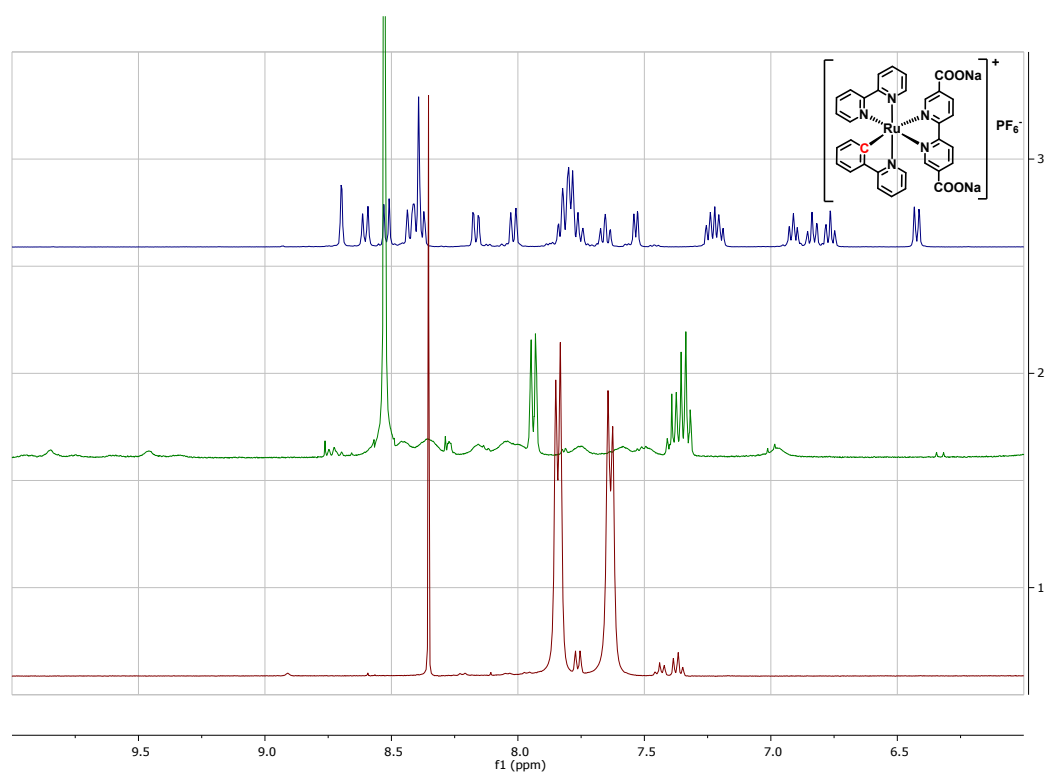

**Figure S33.**  $^1\text{H}$  NMR spectra of 2-Pre digested in 1 M NaOH in  $\text{D}_2\text{O}$  (bottom), redissolved in  $\text{CD}_3\text{OD}$  (middle) and complex 2 in  $\text{CD}_3\text{OD}$  (top).

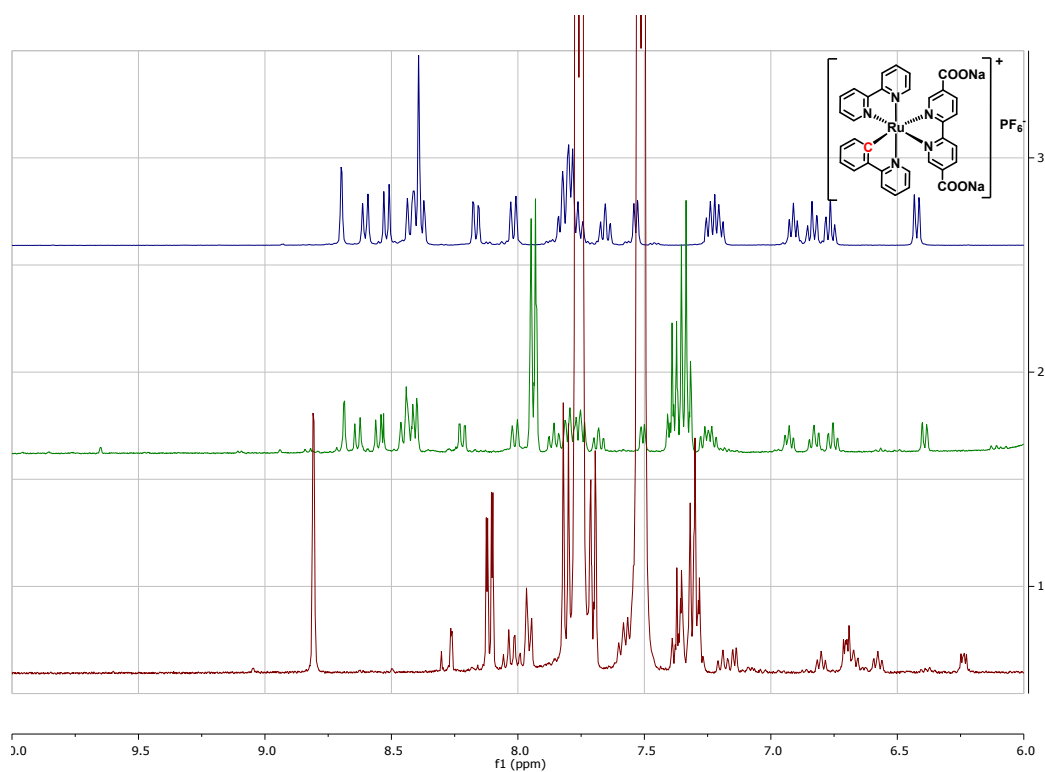

**Figure S34.**  $^1\text{H}$  NMR spectra of 2-Func digested in 1 M NaOH in  $\text{D}_2\text{O}$  (bottom), redissolved in  $\text{CD}_3\text{OD}$  (middle) and complex 2 in  $\text{CD}_3\text{OD}$  (top).

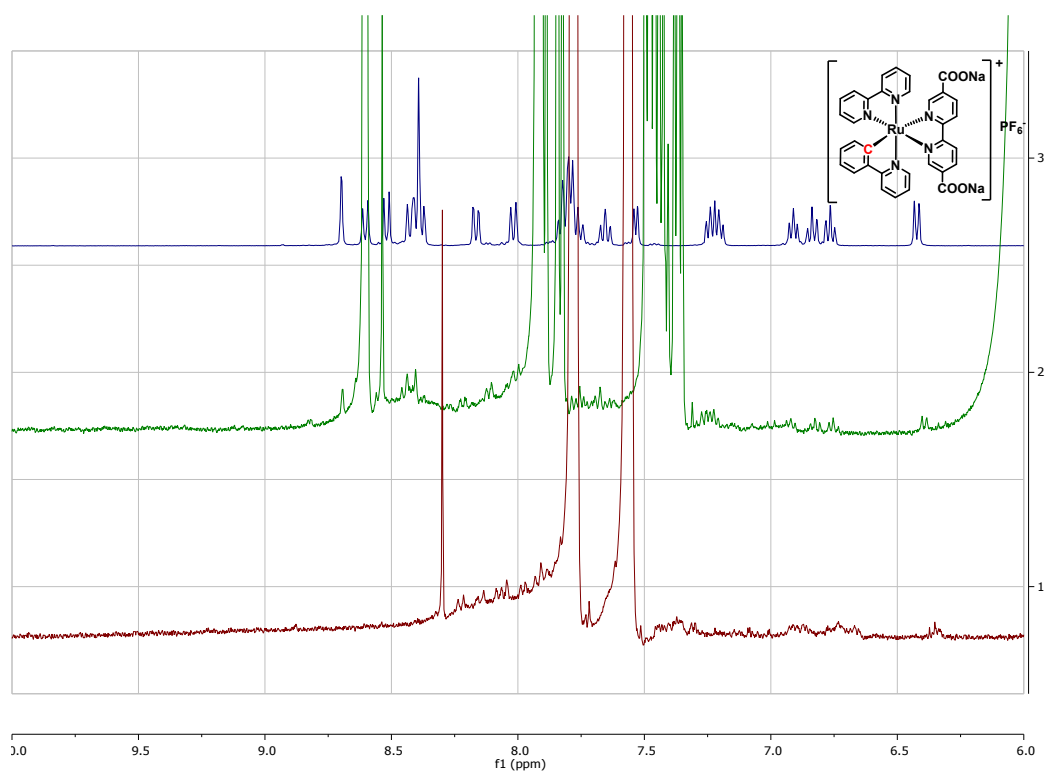

**Figure S35.**  $^1\text{H}$  NMR spectra of 2-Ex digested in 1 M NaOH in  $\text{D}_2\text{O}$  (bottom), redissolved in  $\text{CD}_3\text{OD}$  (middle) and complex 2 in  $\text{CD}_3\text{OD}$  (top).

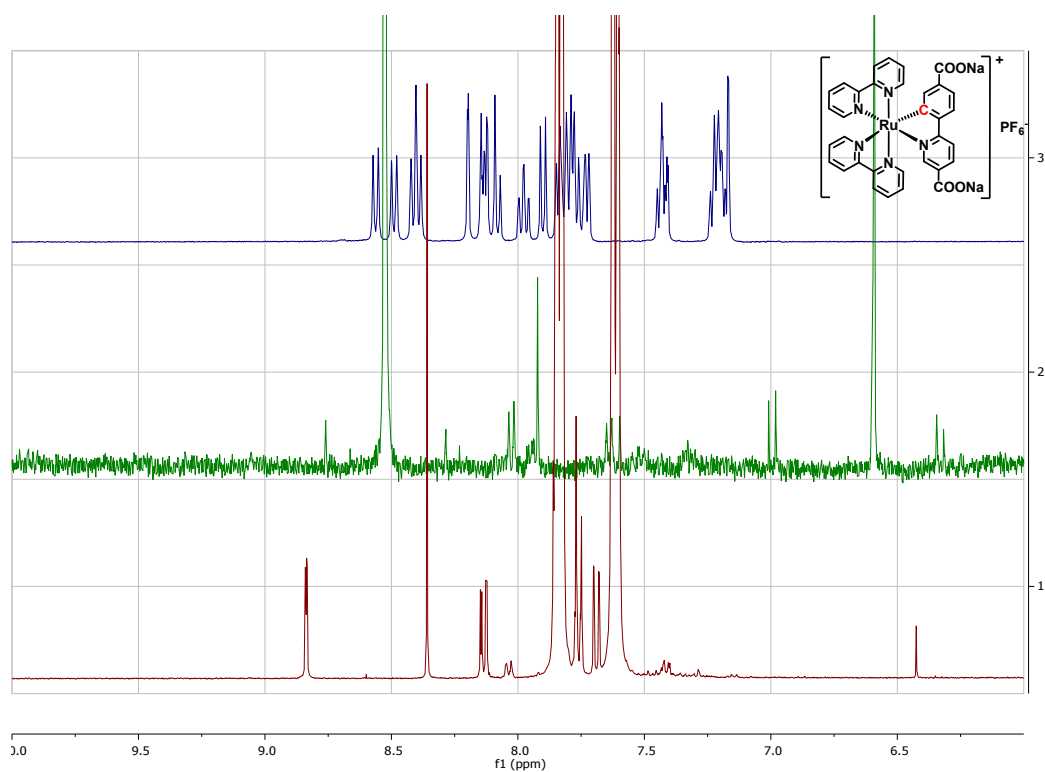

Figure S36.  $^1\text{H}$  NMR spectra of 3-Pre digested in 1 M NaOH in  $\text{D}_2\text{O}$  (bottom), redissolved in  $\text{CD}_3\text{OD}$  (middle) and complex 3 in  $\text{CD}_3\text{OD}$  (top).

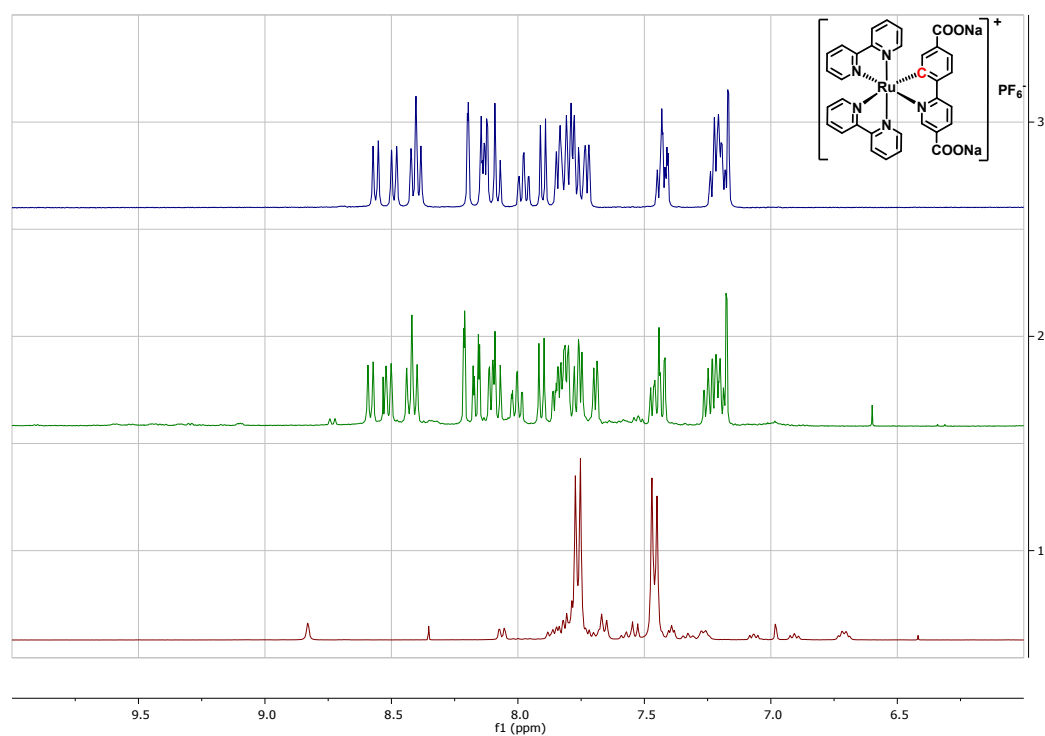

Figure S37.  $^1\text{H}$  NMR spectra of 3-Ex digested in 1 M NaOH in  $\text{D}_2\text{O}$  (bottom), redissolved in  $\text{CD}_3\text{OD}$  (middle) and complex 3 in  $\text{CD}_3\text{OD}$  (top).

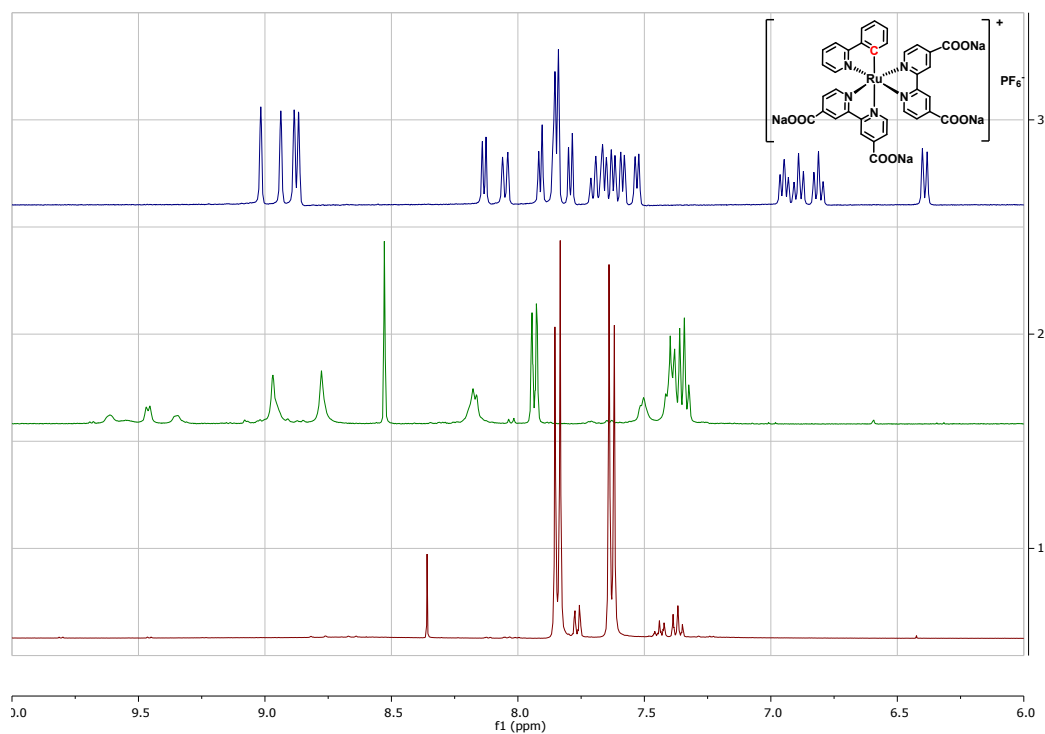

**Figure S38.**  $^1\text{H}$  NMR spectra of 4-Pre digested in 1 M NaOH in  $\text{D}_2\text{O}$  (bottom), redissolved in  $\text{CD}_3\text{OD}$  (middle) and complex 4 in  $\text{CD}_3\text{OD}$  (top).

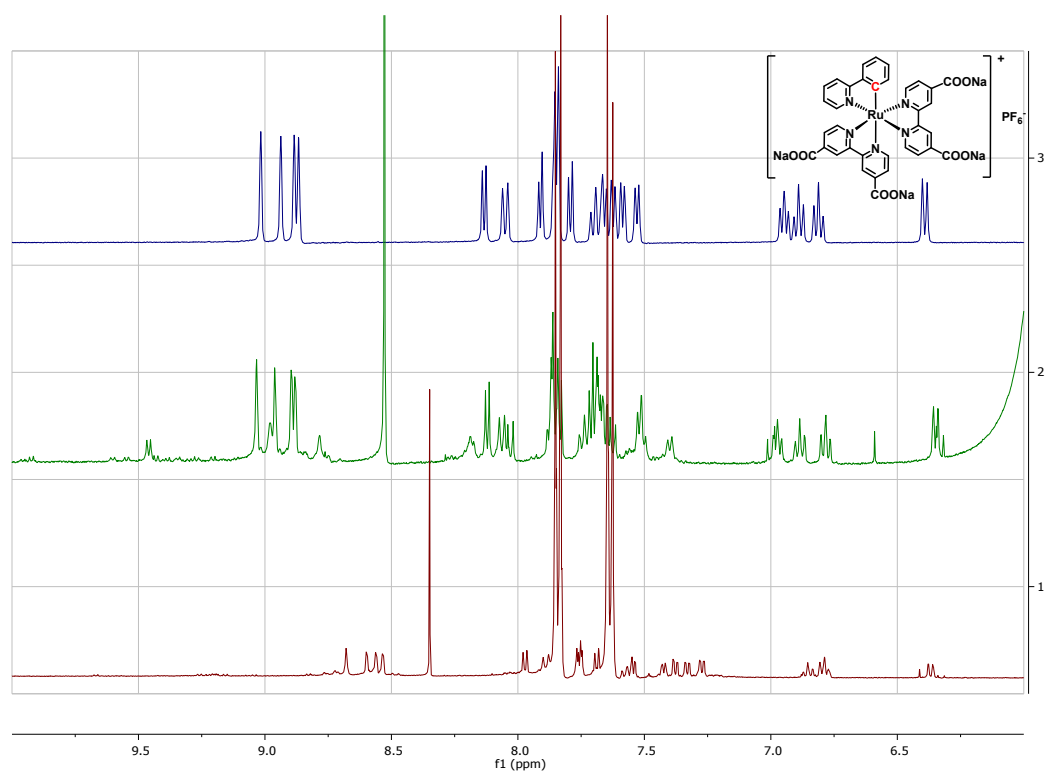

**Figure S39.**  $^1\text{H}$  NMR spectra of 4-Ex digested in 1 M NaOH in  $\text{D}_2\text{O}$  (bottom), redissolved in  $\text{CD}_3\text{OD}$  (middle) and complex 4 in  $\text{CD}_3\text{OD}$  (top).
